## Correction

**Correction for: Combined identification of *ARID1A*, *CSMD1*, and *SENP3* as effective prognostic biomarkers for hepatocellular carcinoma**

Yuanyuan Zhao<sup>1,2,3,4,\*</sup>, Bo Yang<sup>1,2,3,4,\*</sup>, Dong Chen<sup>1,2,3,4,\*</sup>, Xiaojun Zhou<sup>1,2,3,4</sup>, Meixi Wang<sup>1,2,3,4</sup>, Jipin Jiang<sup>1,2,3,4</sup>, Lai Wei<sup>1,2,3,4</sup>, Zhishui Chen<sup>1,2,3,4</sup>

<sup>1</sup>Institute of Organ Transplantation, Tongji Hospital, Tongji Medical College, Huazhong University of Science and Technology, Wuhan 430030, China

<sup>2</sup>Key Laboratory of Organ Transplantation, Ministry of Education, Wuhan 430030, China

<sup>3</sup>NHC Key Laboratory of Organ Transplantation, Wuhan 430030, China

<sup>4</sup>Key Laboratory of Organ Transplantation, Chinese Academy of Medical Sciences, Wuhan 430030, China

\*Equal contribution

**Correspondence to:** Zhishui Chen, Lai Wei; **email:** [zschen@tjh.tjmu.edu.cn](mailto:zschen@tjh.tjmu.edu.cn), [weilai@tjh.tjmu.edu.cn](mailto:weilai@tjh.tjmu.edu.cn)

**Keywords:** differentially expressed genes, characteristic molecular heterogeneity, population specific biomarkers, hepatocellular carcinoma, HBV infection

**Original article:** *Aging (Albany NY)* 2021; 13:4696–4712

PMID: [33558447](https://pubmed.ncbi.nlm.nih.gov/33558447/)

PMCID: [PMC7906131](https://pubmed.ncbi.nlm.nih.gov/PMC7906131/)

doi: [10.18632/aging.202586](https://doi.org/10.18632/aging.202586)

**This article has been corrected:** The authors identified an error in the assembly of Figure 7A. Specifically, the image of transwell invasion assay intended to represent the siRNC (negative control) group in the *SENP3* gene panel was erroneously replaced with the image from the siRNA group. This was an oversight during the figure preparation process.

The Figure 7A *SENP3* siRNC panel has been replaced by the authors using data from the original experiments. This correction does not change the conclusions of the publication.

The corrected version of **Figure 7** is provided below.

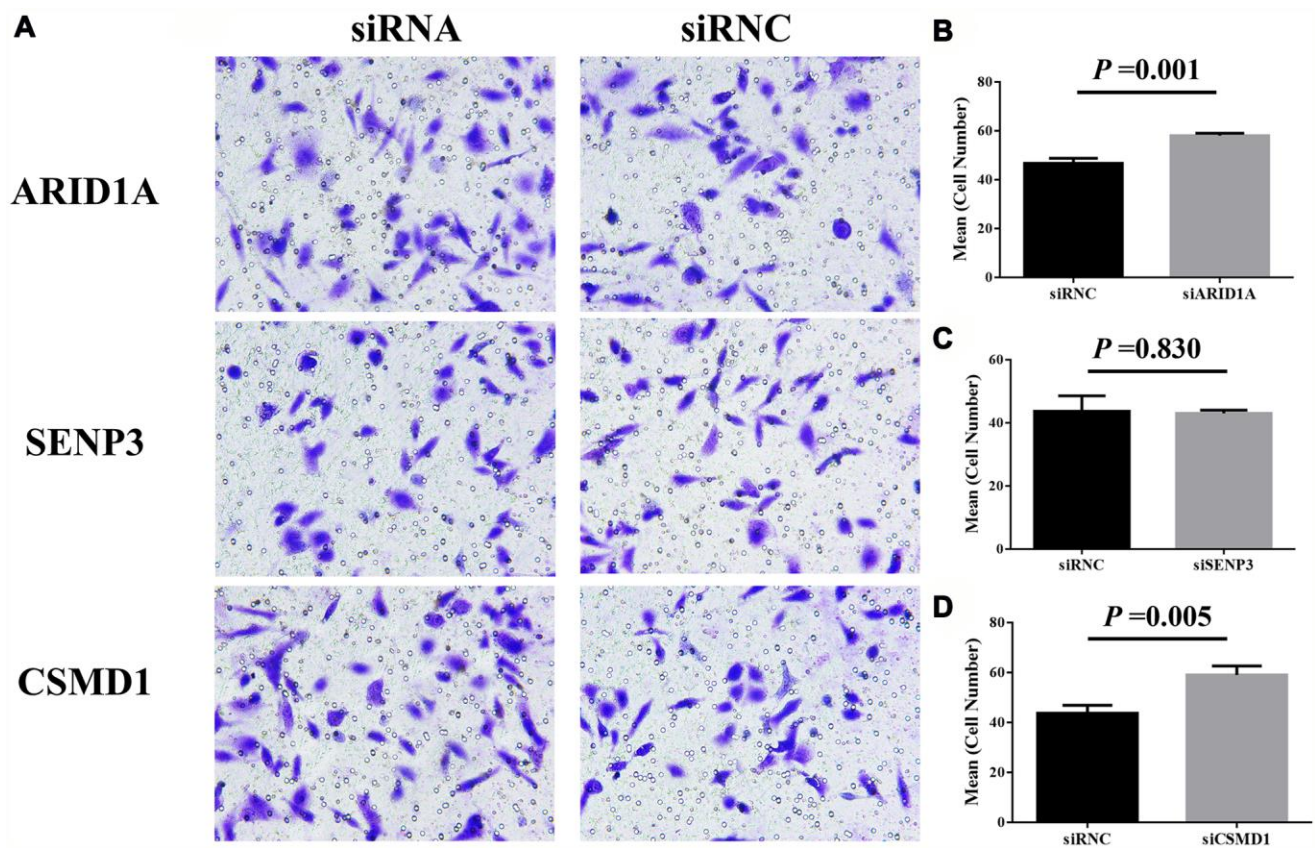

**Figure 7.** Cell invasion after the suppression of genes, *ARID1A*, *CSMD1*, and *SENP3* by siRNA. The images of transwell invasion assay shown in (A) were scanned, quantified, and plotted in (B–D, respectively).
